# Supplementary material
Source: PubMed Central journal article supplement (PMC6824006)

## **Supplemental Legends**

**Supplementary Material Fig S1.** Correlation test for the quantification of ATF4 and RANKL in odontogenic keratocysts (OKC) samples. Correlation analysis showed that there was no significant correlation between RANKL and ATF4 in OKC samples.

**Supplementary Material Fig S2.** Quantification of the mean vascular density (MVD) in odontogenic keratocysts (OKC) and oral mucosa (OM) samples. Student's t-test showed that there was significant difference between OKC and OM samples in terms of MVD.

Mean Density of ATF4

$$Y = -0.1662X + 0.09894$$

$$R = -0.1165$$

$$P = 0.4569$$

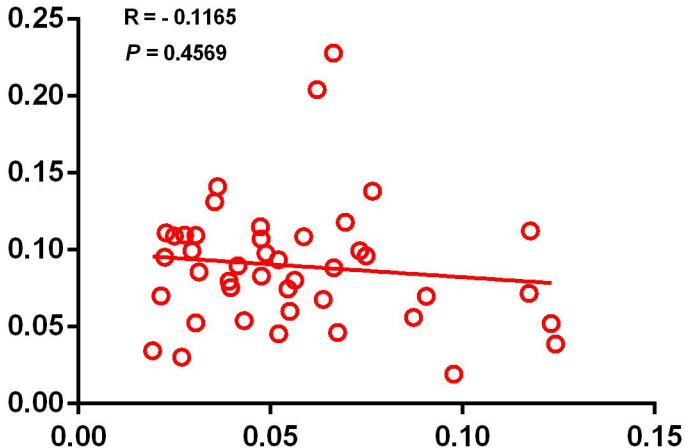

Mean Density of RANKL

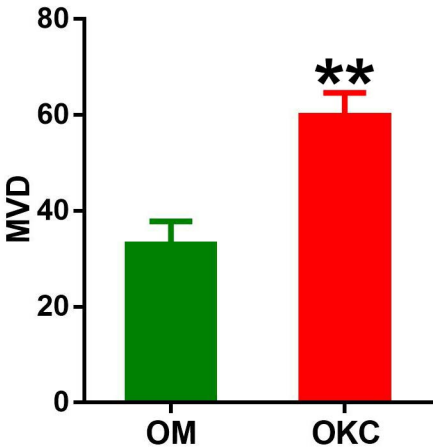

Supplement: DS_10.1369_0022155419871550.pdf [file DS_10.1369_0022155419871550.pdf]
